# Supplementary material for: Older People’s External Residential Assessment Tool (OPERAT): a complementary participatory and metric approach to the development of an observational environmental measure
Source: PubMed Central journal article supplement (PMC5041557; doi:10.1186/s12889-016-3681-x), 2016-09-29
Supplement: 12889_2016_3681_MOESM1_ESM.pdf [file 12889_2016_3681_MOESM1_ESM.pdf]

Additional File 1.

Table: Ranks of weighting survey items, mean satisfaction score, median Thurstone scaling score and weight

| <b>Rank</b> | <b>Item</b>                                        | <b>Mean (SD)<sup>a</sup></b> | <b>Median<sup>b</sup></b> | <b>Weight</b> |
|-------------|----------------------------------------------------|------------------------------|---------------------------|---------------|
| 1           | A view of green space (e.g. fields/forests)        | 4.17 (1.17)                  | 9                         | 4             |
| 2           | Sounds of nature (e.g. birdsong, water)            | 4.14 (1.22)                  | 9                         | 4             |
| 3           | A well-maintained road (e.g. no pots holes/cracks) | 4.13 (1.02)                  | 8                         | 3             |
| 4           | Dog fouling                                        | 4.13 (1.22)                  | 1                         | -4            |
| 5           | A poorly maintained road                           | 3.99 (1.17)                  | 2                         | -3            |
| 6           | Litter                                             | 3.99 (1.23)                  | 2                         | -3            |
| 7           | A well-maintained pavement                         | 3.96 (1.24)                  | 8                         | 3             |
| 8           | A poorly maintained pavement                       | 3.95 (1.30)                  | 2                         | -1            |
| 9           | Burned out/abandoned properties                    | 3.93 (1.47)                  | 2                         | -3            |
| 10          | Well maintained property exteriors                 | 3.93 (1.53)                  | 8                         | 3             |
| 11          | Presence of a pavement                             | 3.92 (1.25)                  | 8                         | 3             |
| 12          | Loud traffic or industrial noises                  | 3.87 (1.36)                  | 2                         | -3            |
| 13          | Broken glass                                       | 3.86 (1.44)                  | 2                         | -3            |
| 14          | Street lighting                                    | 3.86 (1.30)                  | 8                         | 3             |
| 15          | Low traffic level                                  | 3.85 (1.27)                  | 8                         | 3             |
| 16          | Well maintained gardens                            | 3.85 (1.22)                  | 8                         | 3             |
| 17          | Poorly maintained property exteriors               | 3.84 (1.22)                  | 2                         | -3            |
| 18          | Vandalism                                          | 3.83 (1.51)                  | 2                         | -3            |
| 19          | High traffic level                                 | 3.82 (1.34)                  | 2                         | -3            |
| 20          | Poorly maintained gardens                          | 3.74 (1.20)                  | 2                         | -3            |
| 21          | An industrial view (e.g. steel works/factories)    | 3.68 (1.49)                  | 2                         | -3            |
| 22          | Concrete or tarmac pavement                        | 3.64 (1.33)                  | 8                         | 3             |
| 23          | A wide pavement                                    | 3.64 (1.32)                  | 8                         | 3             |
| 24          | Private trees/hedges/foliage                       | 3.58 (1.19)                  | 8                         | 3             |

|    |                                                            |             |   |    |
|----|------------------------------------------------------------|-------------|---|----|
| 25 | Litter bins                                                | 3.57 (1.28) | 8 | 3  |
| 26 | Cars parked on the pavement                                | 3.55 (1.27) | 2 | -3 |
| 27 | Gritting bins for cold conditions                          | 3.54 (1.27) | 7 | 2  |
| 28 | Poorly maintained public buildings (e.g. libraries)        | 3.52 (1.41) | 2 | -3 |
| 29 | Graffiti                                                   | 3.52 (1.52) | 2 | -3 |
| 30 | Well maintained public buildings                           | 3.52 (1.38) | 8 | 3  |
| 31 | Traffic calming measures (e.g. speed bumps/chicanes)       | 3.49 (1.37) | 5 | 0  |
| 32 | Level pavement/road                                        | 3.47 (1.25) | 7 | 2  |
| 33 | Continuous pavement                                        | 3.45 (1.36) | 7 | 2  |
| 34 | Public trees/hedges/foilage                                | 3.44 (1.26) | 7 | 2  |
| 35 | Public grass or verges                                     | 3.43 (1.25) | 7 | 2  |
| 36 | Mainly non-restricted parking                              | 3.43 (1.34) | 5 | 0  |
| 37 | A sea view                                                 | 3.43 (1.50) | 8 | 3  |
| 38 | A narrow pavement                                          | 3.43 (1.32) | 3 | -2 |
| 39 | House numbers or names on properties                       | 3.42 (1.30) | 8 | 3  |
| 40 | Public or private decoration (e.g. hanging baskets)        | 3.84 (1.27) | 8 | 3  |
| 41 | Mainly residents only parking                              | 3.34 (1.39) | 7 | 2  |
| 42 | Bus shelter                                                | 3.34 (1.44) | 7 | 2  |
| 43 | Well maintained bus shelter                                | 3.31 (1.43) | 7 | 2  |
| 44 | Clear and easy to read road name sign                      | 3.30 (1.41) | 7 | 2  |
| 45 | Bus stop                                                   | 3.29 (1.44) | 7 | 2  |
| 46 | White bar markings (to stop parking in front of driveways) | 3.25 (1.40) | 7 | 2  |
| 47 | Walls or buildings which block out the light               | 3.25 (1.50) | 3 | -2 |
| 48 | Unlit alleyways                                            | 3.25 (1.53) | 3 | -2 |
| 49 | Poorly maintained bus shelter                              | 3.25 (1.47) | 3 | -2 |
| 50 | Speed cameras                                              | 3.24 (1.40) | 5 | 0  |
| 51 | An agricultural industrial view (e.g. farmyard machinery)  | 3.23 (1.43) | 3 | -2 |

|    |                                                         |             |   |    |
|----|---------------------------------------------------------|-------------|---|----|
| 52 | Seating in bus shelter                                  | 3.21 (1.40) | 7 | 2  |
| 53 | Dark spots between lighting                             | 3.19 (1.40) | 3 | -2 |
| 54 | Benches or other seating                                | 3.18 (1.38) | 7 | 2  |
| 55 | Road name sign                                          | 3.17 (1.44) | 7 | 2  |
| 56 | Cobble pavement                                         | 3.11 (1.49) | 3 | -2 |
| 57 | Steep slope to pavement/road                            | 3.10 (1.35) | 3 | -2 |
| 58 | A residential view (e.g. housing estates/ cul-de-sac)   | 3.10 (1.32) | 5 | 0  |
| 59 | Dropped kerbs at crossings                              | 3.08 (1.42) | 7 | 2  |
| 60 | Tree cover/canopy in the street                         | 3.06 (1.37) | 5 | 0  |
| 61 | Mid-pavement lamp posts                                 | 3.06 (1.34) | 3 | -2 |
| 62 | Low overhanging trees                                   | 3.06 (1.33) | 3 | -2 |
| 63 | Public toilets                                          | 3.05 (1.50) | 5 | 0  |
| 64 | A commercial view (e.g. a high street)                  | 3.05 (1.42) | 3 | -2 |
| 65 | Man-hole covers on the pavement                         | 3.04 (1.40) | 3 | -2 |
| 66 | Flagstone pavement                                      | 3.04 (1.43) | 5 | 0  |
| 67 | Pedestrian crossings                                    | 3.01 (1.46) | 6 | 1  |
| 68 | CCTV cameras                                            | 2.97 (1.38) | 6 | 1  |
| 69 | Neighbourhood watch signs                               | 2.96 (1.34) | 7 | 2  |
| 70 | Mainly detached properties                              | 2.89 (1.38) | 7 | 2  |
| 71 | Steps on the pavement                                   | 2.88 (1.38) | 4 | -1 |
| 72 | Fences, gates, walls or hedges outside properties       | 2.82 (1.41) | 6 | 1  |
| 73 | Other markers to help navigation                        | 2.81 (1.36) | 6 | 1  |
| 74 | Mainly flats                                            | 2.79 (1.37) | 3 | -2 |
| 75 | Security bars on windows                                | 2.79 (1.49) | 4 | -1 |
| 76 | Railings/other assistance                               | 2.78 (1.35) | 6 | 1  |
| 77 | Lighting from other sources (e.g. overnight businesses) | 2.75 (1.50) | 4 | -1 |
| 78 | Mainly agricultural/farming buildings                   | 2.72 (1.35) | 5 | 0  |
| 79 | Tactile paving on crossings                             | 2.69 (1.34) | 6 | 1  |

|    |                                                       |             |   |    |
|----|-------------------------------------------------------|-------------|---|----|
| 80 | Windows overlooking the street                        | 2.64 (1.38) | 6 | 1  |
| 81 | Mainly semi-detached properties                       | 2.62 (1.28) | 6 | 1  |
| 82 | Mainly terraced properties                            | 2.62 (1.27) | 5 | 0  |
| 83 | For sale signs/vacant properties                      | 2.52 (1.27) | 4 | -1 |
| 84 | Colour of the pavement to contrast with kerb and road | 2.51 (1.30) | 6 | 1  |

---

<sup>a</sup> Mean satisfaction score: range 1-5

<sup>b</sup> Median after Thurstone Scaling: range 1-
