# Supplementary material for: Older People’s External Residential Assessment Tool (OPERAT): a complementary participatory and metric approach to the development of an observational environmental measure
Source: PubMed Central journal article supplement (PMC5041557; doi:10.1186/s12889-016-3681-x), 2016-09-29
Supplement: 12889_2016_3681_MOESM2_ESM.pdf [file 12889_2016_3681_MOESM2_ESM.pdf]

Additional File 2

Table: Observational results for assessments items and correlations with validation items

| <b>OPERAT item</b>                           | <b>%<br/>(yes)</b> | <b>Validation item<sup>c</sup></b>              | <b>Kendall's Tau b</b> | <b>Tested<br/>in EFA</b> |
|----------------------------------------------|--------------------|-------------------------------------------------|------------------------|--------------------------|
| Are there gritting bins for cold conditions? | 16.0               | There are enough gritting bins                  | -0.09*                 | ✓                        |
| Are there litter bins?                       | 16.0               | There are enough litter bins                    | -0.03*                 | ✓                        |
| Are there road name signs?                   | 69.6               | The road name signs are clear and easy to read  | -0.31                  | ‡                        |
| Are the road signs clear and easy to read?   | 69.4               | The road name signs are clear and easy to read  | -0.03                  | ‡                        |
| Are there traffic calming measures?          | 4.4                | There are enough traffic calming measures       | -0.04                  |                          |
| Are there loud traffic or industrial noises? | 27.4               | Loud traffic or industrial noises are a problem | -0.24**                | ✓                        |
| Public grass or verges?                      | 46.4               | There are not enough green areas or trees       | -0.14**                | ✓                        |
| Sounds of nature (e.g. birdsong, water)?     | 83.0               | Sounds of nature can be heard                   | -0.17**                | ✓                        |
| Are there street lights?                     | 81.5               | A lack of street lighting is a problem          | -0.01                  | ‡                        |
| Are there any unlit alleyways?               | 35.6               | Unlit alleyways are a problem                   | -0.07                  | ‡                        |

|                                               |      |                                                            |         |   |
|-----------------------------------------------|------|------------------------------------------------------------|---------|---|
| Is there a bus stop?                          | 9.6  | The proximity of a bus stop is a problem                   | 0.05    |   |
| Is there a bus shelter?                       | 5.7  | The quality of a bus stop is a problem                     | 0.08    |   |
| Is there seating in the bus shelter?          | 5.4  | The quality of a bus stop is a problem                     | 0.08    |   |
| Is there a pavement?                          | 72.6 | The lack of a pavement is a problem                        | 0.15**  | ‡ |
| Is the pavement continuous?                   | 61.0 | The lack of a pavement is a problem                        | 0.21**  | ‡ |
| Main outlook                                  |      |                                                            |         | ✓ |
| <i>Residential</i>                            | 50.1 | This is a desirable place to live                          | 0.10*   |   |
| <i>Green or sea</i>                           | 45.7 | This is a desirable place to live                          | -0.10*  |   |
| <i>Industrial, agricultural or commercial</i> | 4.2  | This is a desirable place to live                          | -0.01   |   |
| Name/Number on property?                      | 87.8 | The properties names or numbers are clear and easy to read | -0.09** | ✓ |
| Trees in garden?                              | 38.1 | There are not enough green areas or trees                  | 0.17**  | ✓ |
| External beautification?                      | 62.4 | The area is nicely kept by its residents                   | -0.12** | ✓ |
|                                               | %    |                                                            |         |   |

|                                              |      |                                                                        |         |   |
|----------------------------------------------|------|------------------------------------------------------------------------|---------|---|
| How well maintained are public buildings?    |      | Public buildings are well maintained                                   | 0.01    |   |
| <i>N/A</i>                                   | 86.7 |                                                                        |         |   |
| <i>Poorly</i>                                | 1.5  |                                                                        |         |   |
| <i>Moderately</i>                            | 2.7  |                                                                        |         |   |
| <i>Well</i>                                  | 9.1  |                                                                        |         |   |
| What is the nature of parking on the street? |      |                                                                        |         | ✓ |
| <i>Residents Only Parking</i>                | 27.2 | There are enough parking spaces for residents and visitors             | -0.29** |   |
| <i>Non-Restricted</i>                        | 22.0 | There are enough parking spaces for residents and visitors around here | 0.15**  |   |
| <i>Mixture</i>                               | 50.9 | There are enough parking spaces for residents and visitors             | 0.18**  |   |
| How well maintained is the bus shelter?      |      |                                                                        |         |   |
| <i>N/A</i>                                   | 92.6 | The quality of the bus stop is a problem                               | -0.08   |   |
| <i>Poorly</i>                                | 0.2  |                                                                        |         |   |
| <i>Moderately</i>                            | 2.0  | The quality of a bus stop is a problem                                 | 0.09*   |   |

|                                  |      |                                             |        |   |
|----------------------------------|------|---------------------------------------------|--------|---|
| <i>Well</i>                      | 5.2  | The quality of a bus stop is a problem      | 0.04   |   |
| How well is pavement maintained? |      |                                             |        | ‡ |
| <i>N/A</i>                       | 27.2 | The condition of the pavements is a problem | 0.01   |   |
| <i>Poorly</i>                    | 2.7  | The condition of the pavements is a problem | -0.04  |   |
| <i>Moderately</i>                | 60.0 | The condition of the pavements is a problem | -0.08  |   |
| <i>Well</i>                      | 10.1 | The condition of the pavements is a problem | 0.12** |   |
| What is the type of pavement?    |      |                                             |        |   |
| <i>N/A</i>                       | 27.4 | The condition of the pavements is a problem | 0.01   |   |
| <i>Tarmac</i>                    | 70.4 | The condition of the pavements is a problem | -0.01  |   |
| <i>Flagstone</i>                 | 2.2  | The condition of the pavements is a problem | -0.01  |   |
| <i>Cobble</i>                    | 0.0  |                                             |        |   |
| How wide is the pavement? (%)    |      |                                             |        | ‡ |
| <i>N/A</i>                       | 26.9 | The condition of the pavements is a problem | 0.01   |   |
| <i>Narrow</i>                    | 8.1  | The condition of the pavements is a problem | -0.01  |   |
| <i>Medium</i>                    | 53.3 | The condition of the pavements is a problem | -0.03  |   |
| <i>Wide</i>                      | 11.6 | The condition of the pavements is a problem | 0.04   |   |

|                                                 |      |                                          |         |   |
|-------------------------------------------------|------|------------------------------------------|---------|---|
| How well is road maintained?                    |      | The condition of the road is a problem   | 0.18**  | ✓ |
| <i>Poorly (or no road in postcode)</i>          | 5.8  |                                          |         |   |
| <i>Moderately</i>                               | 55.0 |                                          |         |   |
| <i>Well</i>                                     | 39.2 |                                          |         |   |
| Pavement/road gradient?                         |      | The incline of the road is a problem     | 0.22*** | ✓ |
| <i>Flat</i>                                     | 51.9 |                                          |         |   |
| <i>Medium (slight incline)</i>                  | 30.9 |                                          |         |   |
| <i>Steep (substantial incline)</i>              | 17.3 |                                          |         |   |
| Garden maintenance?                             |      |                                          |         | ✓ |
| <i>N/A</i>                                      | 9.9  |                                          |         |   |
| <i>Poor</i>                                     | 8.7  | The area is nicely kept by its residents | 0.02    |   |
| <i>Medium</i>                                   | 40.3 | The area is nicely kept by its residents | -0.01   |   |
| <i>Well</i>                                     | 41.1 | The area is nicely kept by its residents | -0.18** |   |
| Property maintenance (as a % of all properties) |      |                                          |         | ✓ |
| <i>Poor</i>                                     | 5.7  | The area is nicely kept by its residents | 0.10**  |   |

|                                                      |                  |                                                  |         |   |
|------------------------------------------------------|------------------|--------------------------------------------------|---------|---|
| <i>Moderate</i>                                      | 44.4             | The area is nicely kept by its residents         | 0.07*   |   |
| <i>Well</i>                                          | 49.9             | The area is nicely kept by its residents         | -0.18** |   |
|                                                      | <b>Mean (SD)</b> |                                                  |         |   |
| Number of benches/other seating?                     | 0.17 (0.65)      | There are enough benches and places to sit       | -.10*   | ‡ |
| Number of cars parked on the pavement?               | 0.68 (1.56)      | Cars parking on the pavement is a problem        | -0.10*  | ‡ |
| Number of instances of vandalism?                    | 0.01 (0.11)      | Vandalism is a problem                           | -0.08*  | ‡ |
| Number of instances of graffiti?                     | 0.02 (0.19)      | Graffiti is a problem                            | -0.07   | ‡ |
| Number of instances of dog fouling?                  | 0.05 (0.29)      | Dog fouling is a problem                         | 0.03    | ‡ |
| Number of instances of littering?                    | 0.36 (0.83)      | Litter is a problem                              | -0.12** | ‡ |
| Number of instances of broken glass (on the ground)? | 0.00 (0.05)      | Broken glass on the ground is a problem          | -0.04   | ‡ |
| Number of burned out/abandoned properties?           | 0.06 (0.28)      | Burned out or abandoned properties are a problem | -0.04   |   |
| Number of public trees?                              | 1.83 (4.00)      | There are not enough green areas or trees        | -0.03   |   |
| Number of vehicles passed during assessment?         | 3.41 (7.17)      | There is a high volume of traffic                | -0.30** | ‡ |

|                                                                |             |                                                           |       |   |
|----------------------------------------------------------------|-------------|-----------------------------------------------------------|-------|---|
| Number of walls or buildings blocking the light in the street? | 0.32 (0.61) | Walls or buildings which obstruct the light are a problem | -0.05 | ‡ |
|----------------------------------------------------------------|-------------|-----------------------------------------------------------|-------|---|

---

\*  $p < .05$       \*\*  $p < .005$       \*\*\*  $p < .001$

✓ Tested in EFA models

‡ Tested in EFA models as modified variable

° Each item specified 'around here'
