# Supplementary material for: Older People’s External Residential Assessment Tool (OPERAT): a complementary participatory and metric approach to the development of an observational environmental measure
Source: PubMed Central journal article supplement (PMC5041557; doi:10.1186/s12889-016-3681-x), 2016-09-29
Supplement: 12889_2016_3681_MOESM3_ESM.pdf [file 12889_2016_3681_MOESM3_ESM.pdf]

## Older People's External Residential Assessment Tool 2016

|          |  |                      |                        |
|----------|--|----------------------|------------------------|
| Postcode |  | Number of properties |                        |
| Date     |  | Time of assessment   | Duration of assessment |

### Street Level Observations

| Tick yes or no for items 1-8                                      | YES                      | NO                       |
|-------------------------------------------------------------------|--------------------------|--------------------------|
| 1. Is there public grass or verges?                               | <input type="checkbox"/> | <input type="checkbox"/> |
| 2. Are there sounds of nature (e.g. birdsong, water)?             | <input type="checkbox"/> | <input type="checkbox"/> |
| 3. Are there clear and easy to read road name signs?              | <input type="checkbox"/> | <input type="checkbox"/> |
| 4. Are there street lights?                                       | <input type="checkbox"/> | <input type="checkbox"/> |
| 5. Are there any unlit alleyways?                                 | <input type="checkbox"/> | <input type="checkbox"/> |
| 6. Are there instances of littering, dog fouling or broken glass? | <input type="checkbox"/> | <input type="checkbox"/> |
| 7. Are there loud traffic or industrial noises?                   | <input type="checkbox"/> | <input type="checkbox"/> |

**Tick a single box which corresponds to the response for items 8-13**

8. Approximate number of vehicles that drove past during assessment?

|                          |                |
|--------------------------|----------------|
| <input type="checkbox"/> | NONE           |
| <input type="checkbox"/> | ONE TO ELEVEN  |
| <input type="checkbox"/> | TWELVE OR MORE |

9. What is the nature of parking on the street?

|                          |                    |
|--------------------------|--------------------|
| <input type="checkbox"/> | RESIDENTS ONLY     |
| <input type="checkbox"/> | NOT RESIDENTS ONLY |

10. Is there a continuous pavement, that is wide enough for 2 people or a wheelchair and is well maintained

|                          |                                                        |
|--------------------------|--------------------------------------------------------|
| <input type="checkbox"/> | NO PAVEMENT                                            |
| <input type="checkbox"/> | YES, BUT NOT CONTINUOUS, NARROW OR NOT WELL MAINTAINED |
| <input type="checkbox"/> | YES, CONTINUOUS, WIDE/MODERATELY WIDE, WELL MAINTAINED |

11. How steep is the pavement and/or road?

|                          |                                                    |
|--------------------------|----------------------------------------------------|
| <input type="checkbox"/> | FLAT:                                              |
| <input type="checkbox"/> | MEDIUM: Slight incline, not troublesome to walk up |
| <input type="checkbox"/> | STEEP: Substantial incline, taxing to walk up      |

**12. How well is the road maintained?**

**WELL: Good condition, no maintenance required**

**MODERATELY: Only minor repairs required**

**POORLY: Lots of pot holes, trip risks, no evidence of repair**

**13. What is the main outlook?**

**RESIDENTIAL**

**GREEN OR SEA**

**AGRICULTURAL INDUSTRIAL, INDUSTRIAL OR COMMERCIAL**
